# Supplementary material
Source: Springer Nature journal article supplement (https://www.springermedizin.de/resource/supplementary/12935_2009_240_MOESM7_ESM.pdf/9540224)

**G292**

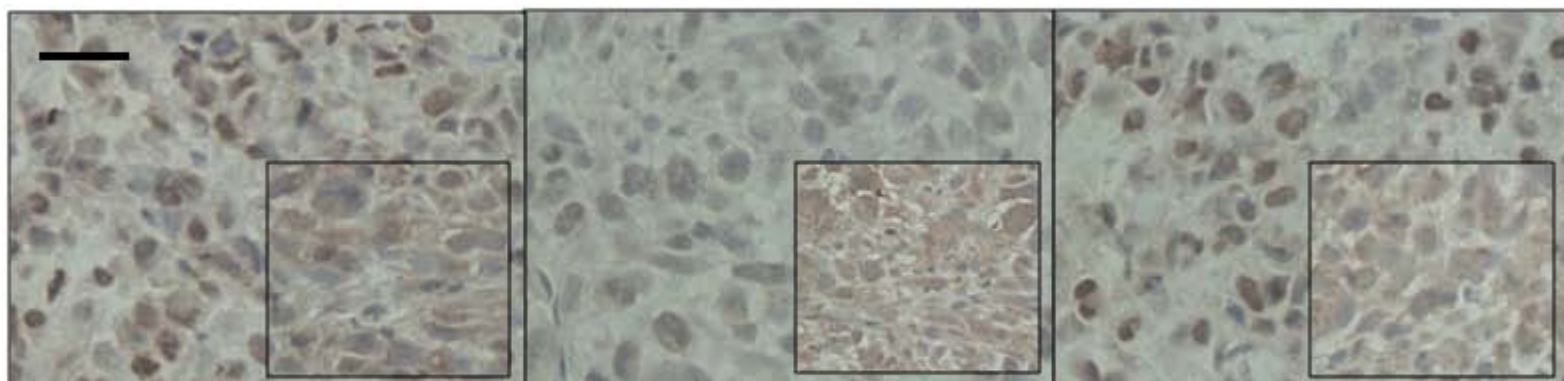

**PC3**

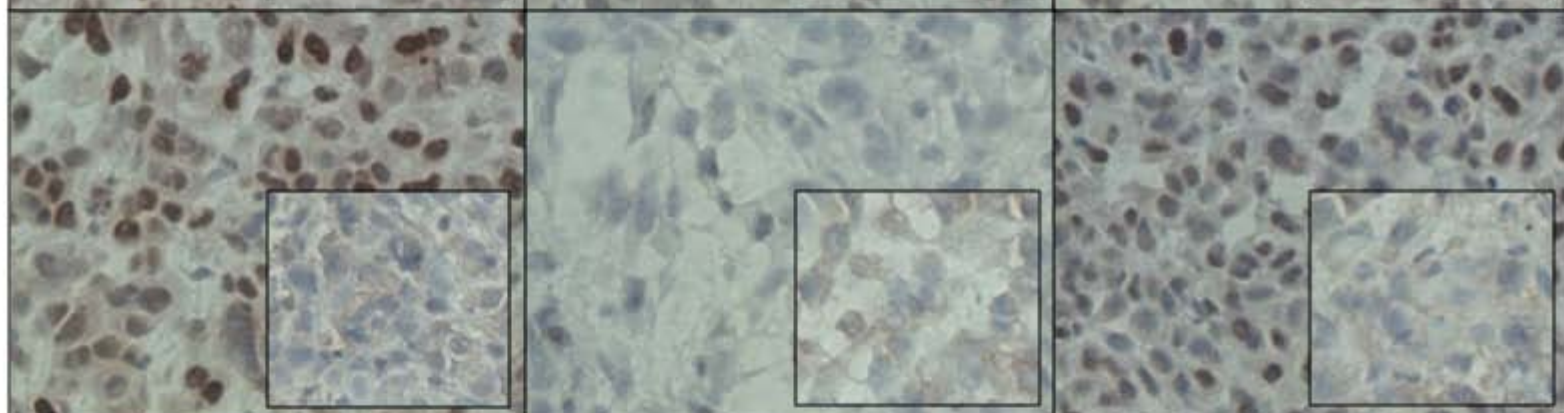

**MDA-  
MB231**

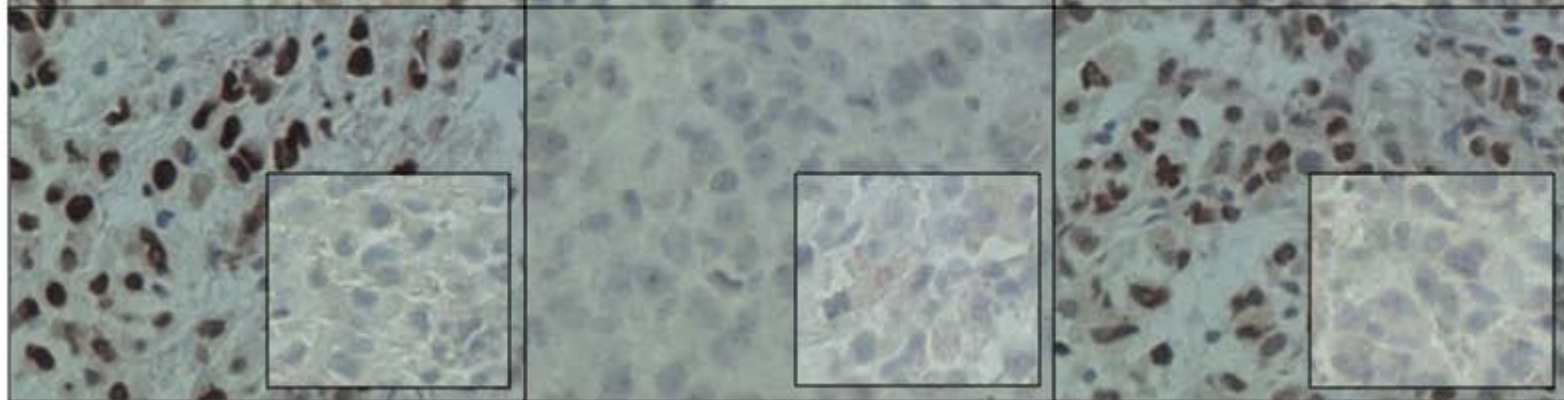

**Cells**

**Dz13**

**Scr**

Supplement: MOESM7 [file 9540224]
